# Supplementary material
Source: Royal Society of Chemistry journal article supplement (doi:10.1039/d6cp01306f)
Supplement: d6cp01306f1.pdf [file d6cp01306f1.pdf]

## Supporting Information

In-depth insight into the corrosion inhibition mechanism of *panax notoginseng* leaves extract on the corrosion of mild steel in acidic environment

Ning Xu <sup>a#</sup>, Xiaobei Yang <sup>b#</sup>, Xiaojie Ma <sup>a</sup>, Bokai Liao <sup>c\*</sup>, Qinghua Zhang <sup>a\*</sup>

<sup>a</sup> *School of Chemical and Environmental Engineering, Anhui Polytechnic University, Wuhu 241000, P.R. China*

<sup>b</sup> *Faculty of Pharmacy, Yunnan Medical Healthy College, Kunming 650033, P.R. China*

<sup>c</sup> *School of Chemistry and Chemical Engineering, Guangzhou University, Guangzhou, 510006, P.R. China*

---

\* Corresponding author;

E-mail address: [bokailiao@gzhu.edu.cn](mailto:bokailiao@gzhu.edu.cn) (Bokai Liao), [qinghua.zhang@mail.ahpu.edu.cn](mailto:qinghua.zhang@mail.ahpu.edu.cn) (Qinghua Zhang)

# Ning Xu and Xiaobei Yang contribute equally to this work

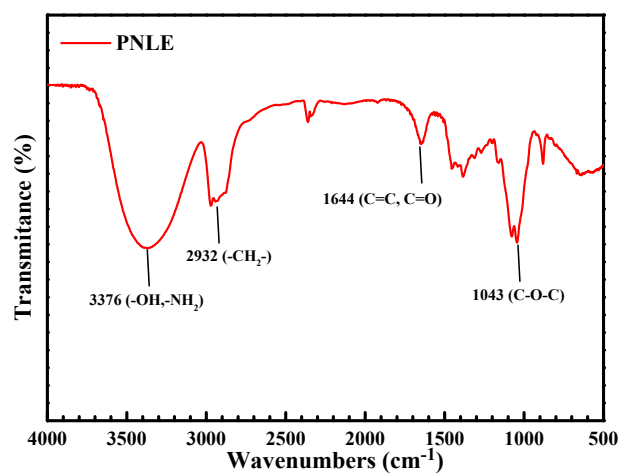

Fig. S1 FT-IR of *panax notoginseng* leaves extract.

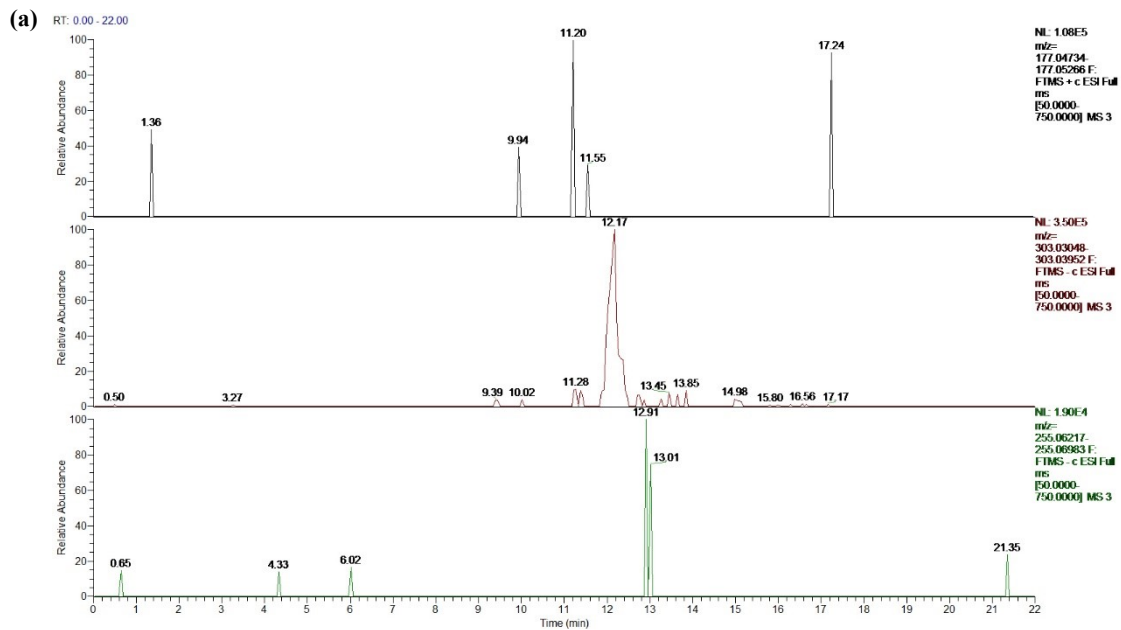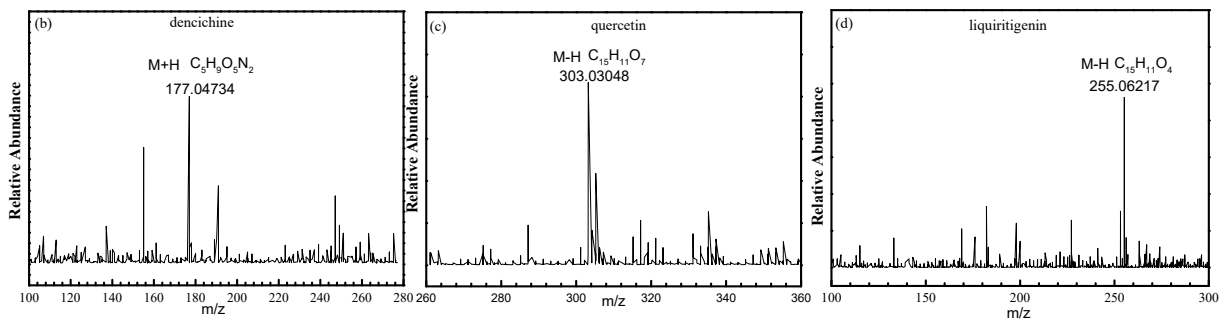

Fig. S2 LC-MS spectrum of the typical compounds in PNLE:(a) LC, (b) dencichine, (c) quercetin, (d) liquiritigenin.

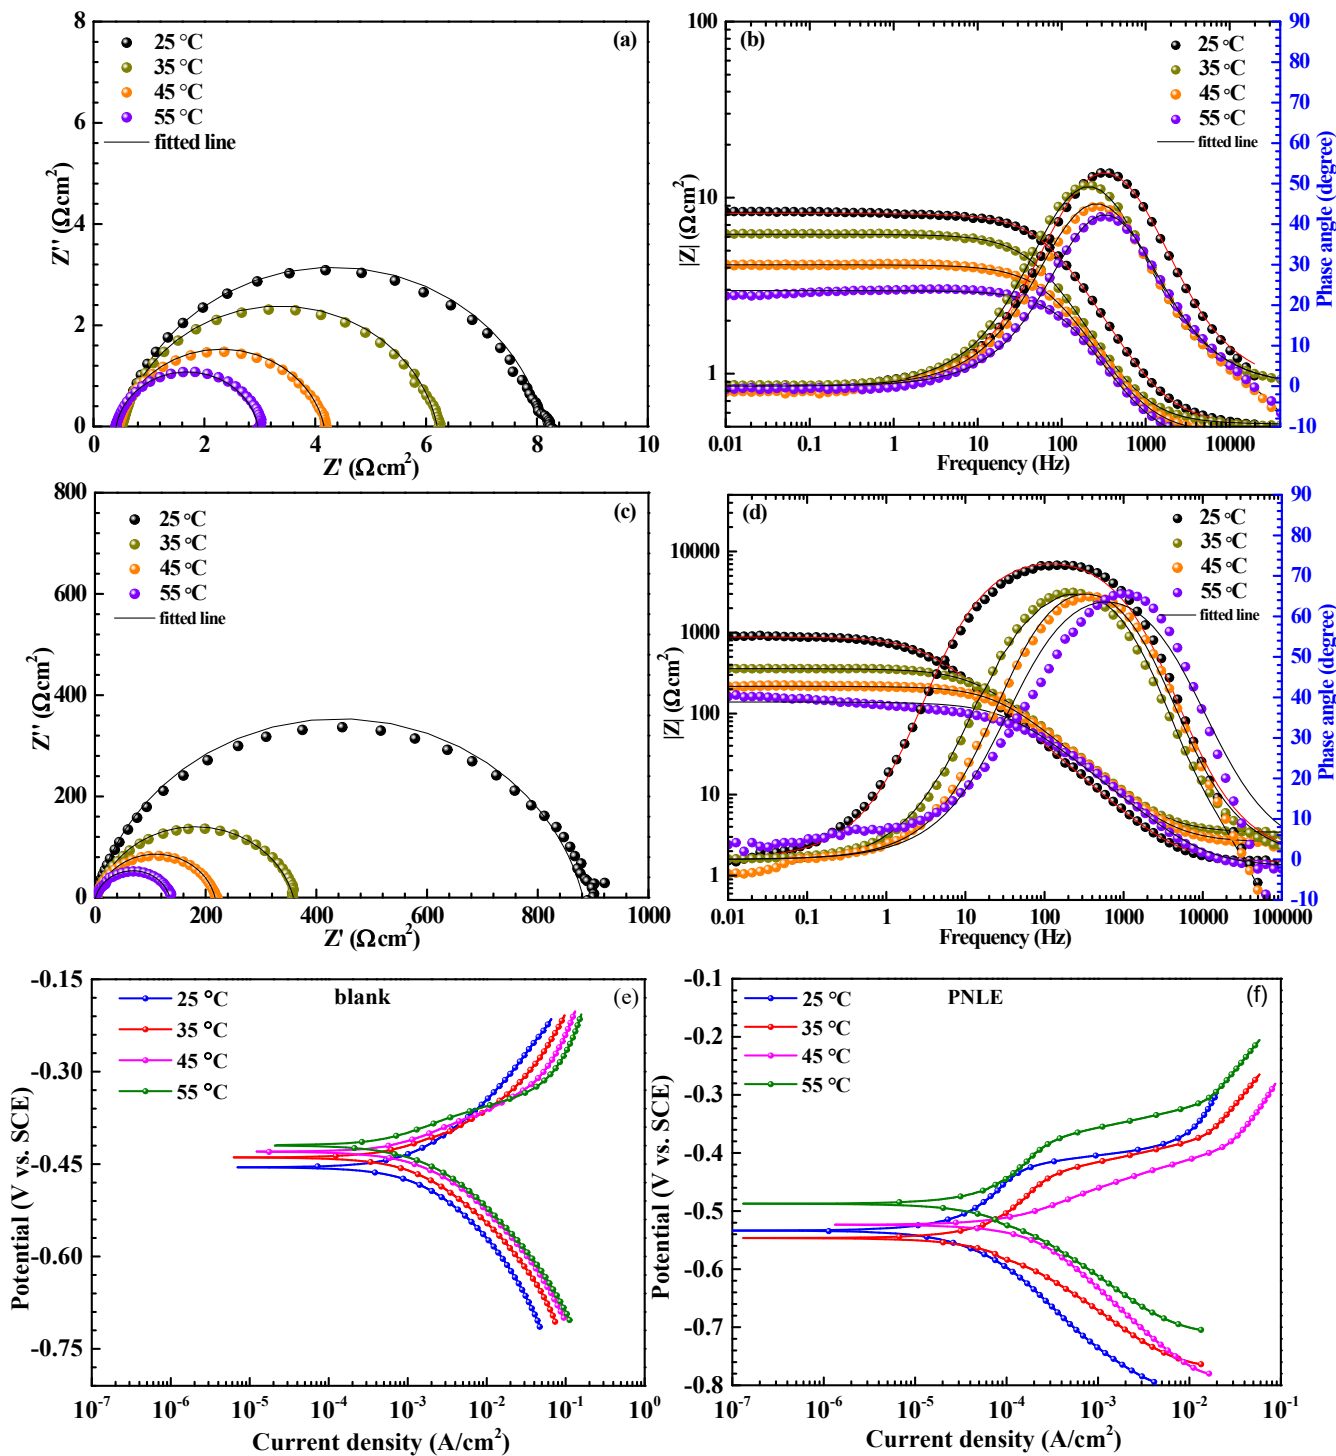

Fig. S3 Electrochemical test data of MS after soaked in test medium without or with 400 mg/L PNLE at different temperature: (a, b, e) in the blank solution, (c, d, f) in the solution containing 400 mg/L PNLE.

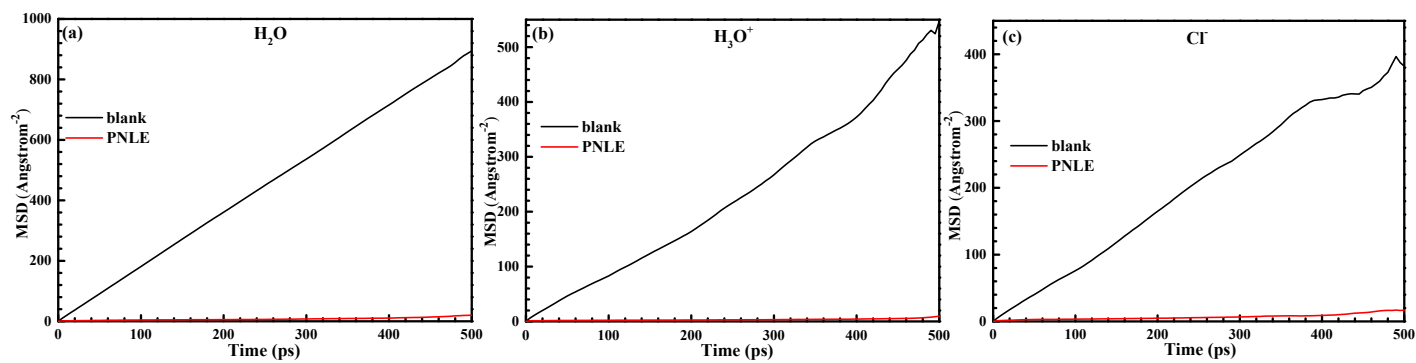

Fig. S4 MSD plots of the diffusion of corrosive species in the blank solution (H<sub>2</sub>O phase) and the adsorbed inhibitor film: (a) H<sub>2</sub>O, (b) H<sub>3</sub>O<sup>+</sup>, (c) Cl<sup>-</sup>.

Table S1 The chemical composition of Q235 mild steel

| Elements    | C    | Si   | Mn   | P     | S    | Cr   | Fe      |
|-------------|------|------|------|-------|------|------|---------|
| Content (%) | 0.20 | 0.30 | 0.35 | 0.030 | 0.35 | 0.25 | balance |

Table S2 Inhibition of steel by different plant extract in 1 M HCl medium

| Extract                               | Medium    | Material         | Concentration | $\eta\%$ | Ref.      |
|---------------------------------------|-----------|------------------|---------------|----------|-----------|
| <i>lemon verbena</i>                  | 1 M HCl   | Mild steel       | 2500 mg/L     | 94.9     | [1]       |
| <i>Ruta graveolens</i>                | 1 M HCl   | 304 SS           | 450 mg/L      | 94.3     | [2]       |
| <i>Pouzolzia zeylanica L.</i>         | 0.5 M HCl | SS-410           | 400 mg/L      | 94.9     | [3]       |
| <i>Zea mays bracts</i>                | 1 M HCl   | Mild steel       | 5 g/L         | 82.0     | [4]       |
| <i>Ammophila arenaria</i>             | 1 M HCl   | Mild steel       | 700 mg/L      | 84.3     | [5]       |
| <i>Chamaerops humilis fruit waste</i> | 1 M HCl   | low carbon steel | 500 mg/L      | 91.4     | [6]       |
| PNLE                                  | 1 M HCl   | Mild steel       | 400 mg/L      | 99.1     | This work |

Table S3 The fitted EIS parameters of MS in test medium without or with 400 mg/L

PNLE inhibitor at different temperatures

| Inhibitors | Temperature<br>(°C) | $R_s$<br>( $\Omega \text{ cm}^2$ ) | $CPE_{dl}$                                                 |           | $R_{ct}$<br>( $\Omega \text{ cm}^2$ ) | $\eta_R(\%)$ |
|------------|---------------------|------------------------------------|------------------------------------------------------------|-----------|---------------------------------------|--------------|
|            |                     |                                    | $Y_0$ ( $\mu\Omega^{-1} \text{ s}^n$<br>$\text{cm}^{-2}$ ) | n         |                                       |              |
| blank      | 25                  | 2.10±0.13                          | 520.6±23.5                                                 | 0.80±0.02 | 8±2                                   |              |
|            | 35                  | 1.16±0.14                          | 1051.0±27.8                                                | 0.89±0.03 | 5.7±1.1                               |              |
|            | 45                  | 1.02±0.07                          | 1228.0±16.1                                                | 0.88±0.01 | 3.7±1.2                               |              |
|            | 55                  | 1.19±0.15                          | 1166.0±13.3                                                | 0.89±0.04 | 2.6±0.6                               |              |
| inhibitors | 25                  | 1.48±0.07                          | 92.8±8.6                                                   | 0.86±0.02 | 881±28                                | 99.1         |
|            | 35                  | 1.54±0.11                          | 139.5±10.3                                                 | 0.85±0.01 | 355±17                                | 98.4         |
|            | 45                  | 1.29±0.09                          | 118.9±9.4                                                  | 0.86±0.04 | 214±11                                | 98.3         |
|            | 55                  | 1.33±0.12                          | 65.2±7.8                                                   | 0.85±0.02 | 134±10                                | 98.1         |

Table S4 Fitted electrochemical parameters of the polarization curves for MS in 1 M HCl solution without or with 400 mg/L PNLE inhibitor at different temperatures

| Inhibitors | Temperature (°C) | $E_{\text{corr}}$ (V vs. SCE) | $i_{\text{corr}}$ (A/cm <sup>2</sup> ) | $b_a$ (mV/dec) | $b_c$ (mV/dec) | $\eta_P$ (%) |
|------------|------------------|-------------------------------|----------------------------------------|----------------|----------------|--------------|
| blank      | 25               | -0.456±0.002                  | (1.87±0.09)×10 <sup>-3</sup>           | 170±6          | -158±3         | -            |
|            | 35               | -0.444±0.002                  | (2.66±0.05)×10 <sup>-3</sup>           | 160±2          | -168±3         | -            |
|            | 45               | -0.437±0.002                  | (4.16±0.08)×10 <sup>-3</sup>           | 186±1          | -189±5         | -            |
|            | 55               | -0.435±0.001                  | (5.71±0.10)×10 <sup>-3</sup>           | 175±3          | -215±7         | -            |
| inhibitor  | 25               | -0.533±0.005                  | (1.22±0.02)×10 <sup>-5</sup>           | 92±13          | -106±6         | 99.35        |
|            | 35               | -0.535±0.003                  | (3.58±0.05)×10 <sup>-5</sup>           | 65±8           | -107±5         | 98.65        |
|            | 45               | -0.521±0.002                  | (1.48±0.03)×10 <sup>-4</sup>           | 116±15         | -128±7         | 96.44        |
|            | 55               | -0.487±0.004                  | (2.39±0.04)×10 <sup>-4</sup>           | 87±10          | -227±8         | 95.81        |

Table S5 The fitted EIS parameters of MS corroded in different concentrations of HCl media without or with 400 mg/L *Swertia cincta* extract inhibitor at 25 °C

| Inhibitors | HCl (M) | $R_s$ (Ω cm <sup>2</sup> ) | $CPE_{dl}$                                                |           | $R_{ct}$ (Ω cm <sup>2</sup> ) | $\eta_R$ (%) |
|------------|---------|----------------------------|-----------------------------------------------------------|-----------|-------------------------------|--------------|
|            |         |                            | $Y_0$ (μΩ <sup>-1</sup> s <sup>n</sup> cm <sup>-2</sup> ) | n         |                               |              |
| blank      | 1       | 2.10±0.13                  | 520.6±23.5                                                | 0.80±0.02 | 8±2                           |              |
|            | 3       | 1.61±0.09                  | 646.9±26.7                                                | 0.84±0.05 | 6.5±1.6                       |              |
|            | 5       | 1.57±0.10                  | 447.1±21.2                                                | 0.86±0.04 | 3.6±1.2                       |              |
| inhibitors | 1       | 1.48±0.07                  | 92.8±8.6                                                  | 0.86±0.02 | 881±28                        | 99.1         |
|            | 3       | 0.83±0.05                  | 59.1±5.3                                                  | 0.82±0.05 | 287±19                        | 97.7         |
|            | 5       | 0.74±0.04                  | 149.4±12.7                                                | 0.83±0.03 | 148±13                        | 97.6         |

Table S6 The fitted PC parameters of MS corroded in different concentrations of HCl media without or with 400 mg/L *Swertia cincta* extract inhibitor at 25 °C

| Inhibitors | HCl (M) | $E_{\text{corr}}$ (V vs. SCE) | $i_{\text{corr}}$ (A/cm <sup>2</sup> ) | $b_a$ (mV/dec) | $b_c$ (mV/dec) | $\eta_P$ (%) |
|------------|---------|-------------------------------|----------------------------------------|----------------|----------------|--------------|
| blank      | 1       | -0.456±0.002                  | (1.87±0.09)×10 <sup>-3</sup>           | 170±6          | -158±3         | -            |
|            | 3       | -0.419±0.004                  | (3.52±0.13)×10 <sup>-3</sup>           | 136±2          | -164±2         | -            |
|            | 5       | -0.408±0.003                  | (6.67±0.18)×10 <sup>-3</sup>           | 142±5          | -133±4         | -            |
| inhibitor  | 1       | -0.533±0.005                  | (1.22±0.02)×10 <sup>-5</sup>           | 92±13          | -106±6         | 99.35        |
|            | 3       | -0.481±0.003                  | (1.02±0.03)×10 <sup>-4</sup>           | 52±11          | -156±9         | 97.10        |
|            | 5       | -0.439±0.004                  | (2.25±0.05)×10 <sup>-4</sup>           | 80±14          | -117±7         | 96.63        |

## References

- [1] G.S. Sajadi, F. Salmanian, R. Naghizade, S.M.A. Hosseini, *Int. J. Electrochem. Sci.*, 2024, **19**, 100699.
- [2] S.E. Hernández-Sánchez, J.P. Flores-De los Rios, H.A. Monreal-Romero, N.R. Flores-Holguin, L.M. Rodríguez-Valdez, M. Sánchez-Carrillo, A.D. Delgado, J.G. Chacón-Nava, *Metals*, 2024, **14**, 1267.
- [3] V. Tripathi, D. Prasad, R. Maithani, B.E. Ibrahimii, *J. Taiwan Inst. Chem. Eng.*, 2024, **165**, 105693.
- [4] J.-h. Zhu, B.-l. Lin, T.-h. Duan, H.-q. Lin, G.-y. Zhang, X.-x. Zhou, Y.-y. Xu, *Arab. J. Chem.*, 2024, **17**, 105895.
- [5] Z. Jebali, H. Ferkous, M. Zerroug, A. Boubli, A. Delimi, A. Bouzid, H. Majdoub, B. Ernst, N. Elboughdiri, Y. Benguerba, *J. Environ. Chem. Eng.*, 2024, **12**, 112374.
- [6] F.-Z. Eddahhaoui, A. Najem, M. Elhawary, M. Boudalia, O.S. Campos, M. Tabyaoui, A. José Garcia, A. Bellaouchou, H.M.A. Amin, *J. Alloys Compd.*, 2024, **977**, 173307.
